# Supplementary material for: Culture positivity may correlate with long-term mortality in critically ill patients
Source: Springer Nature journal article supplement (doi:10.1186/s12879-021-06898-8), 2021-11-26
Supplement: MOESM1 [file 19904266]

**Supplemental Table 1. Effect modification of variables on the association between culture positivity and risk of mortality**

| <b>Groups</b>                    | <b>adjHR (95% CI)</b> | <b><i>p</i> value</b> | <b><i>p</i> for interaction</b> |
|----------------------------------|-----------------------|-----------------------|---------------------------------|
| <b>Age, years</b>                |                       |                       | 0.322                           |
| ≤ 50                             | 2.073 (1.645-2.613)   | <0.001                |                                 |
| > 50                             | 2.037 (1.864-2.227)   | <0.001                |                                 |
| <b>Sex</b>                       |                       |                       | 0.676                           |
| Female                           | 2.021 (1.751-2.333)   | <0.001                |                                 |
| Male                             | 2.133 (1.927-2.361)   | <0.001                |                                 |
| <b>Presence of shock</b>         |                       |                       | <0.001                          |
| No                               | 2.440 (2.151-2.767)   | <0.001                |                                 |
| Yes                              | 1.374 (1.135-1.663)   | 0.001                 |                                 |
| <b>Renal replacement therapy</b> |                       |                       | 0.001                           |
| No                               | 2.101 (1.915-2.304)   | <0.001                |                                 |
| Yes                              | 1.580 (1.335-1.870)   | <0.001                |                                 |
| <b>Immunodeficiency</b>          |                       |                       | <0.001                          |
| No                               | 2.308 (2.097-2.540)   | <0.001                |                                 |
| Yes                              | 1.242 (1.111-1.388)   | <0.001                |                                 |
| <b>Immunodeficiency type</b>     |                       |                       | 0.652                           |
| No                               | 2.308 (2.097-2.540)   | <0.001                |                                 |
| Solid tumor, active              | 1.172 (0.955-1.438)   | 0.129                 |                                 |
| Hematological malignancy         | 2.016 (1.403-2.896)   | <0.001                |                                 |
| Autoimmune diseases              | 3.224 (1.775-5.855)   | <0.001                |                                 |
| Organ transplant recipients      | 4.278 (0.938-19.52)   | 0.061                 |                                 |

Abbreviations: HR, hazard ratio.

**Supplemental Table 2. Cox proportional hazards regression for 30-day mortality.**

| Characteristics                             | Univariable         |                | Multivariable       |                |
|---------------------------------------------|---------------------|----------------|---------------------|----------------|
|                                             | HR (95% C.I.)       | <i>p</i> value | HR (95% C.I.)       | <i>p</i> value |
| Age, per 1 year increment                   | 1.002 (0.998-1.005) | 0.355          | 0.995 (0.991-0.999) | 0.007          |
| Male gender                                 | 1.075 (0.954-1.211) | 0.236          | 1.120 (0.993-1.265) | 0.065          |
| Body mass index, per 1 decrement            | 0.993 (0.981-1.004) | 0.200          | 1.017 (1.004-1.030) | 0.010          |
| Charlson comorbidity index, per 1 increment | 1.127 (1.090-1.164) | <0.001         | 1.053 (1.015-1.092) | 0.006          |
| APACHE II, per 1 increment                  | 1.117 (1.107-1.126) | <0.001         | 1.077 (1.066-1.088) | <0.001         |
| Receiving mechanical ventilation            | 1.878 (1.615-2.184) | <0.001         | 0.821 (0.696-0.968) | 0.019          |
| Fluid overload, day 1-3, per 1L increment   | 1.118 (1.106-1.130) | <0.001         | 1.059 (1.045-1.072) | <0.001         |
| Receiving renal replacement therapy         | 2.840 (2.510-3.214) | <0.001         | 1.558 (1.361-1.784) | <0.001         |
| Presence of shock                           | 4.060 (3.571-4.616) | <0.001         | 2.261 (1.956-2.615) | <0.001         |
| Immunocompromised patients                  | 2.854 (2.525-3.227) | <0.001         | 2.239 (1.972-2.542) | <0.001         |
| Culture site                                |                     |                |                     |                |
| Blood                                       | 2.118 (1.854-2.420) | <0.001         | 1.126 (0.975-1.301) | 0.107          |
| Respiratory tract                           | 1.437 (1.283-1.609) | <0.001         | 0.957 (0.847-1.080) | 0.477          |
| Urinary tract                               | 1.190 (1.036-1.366) | 0.014          | 0.962 (0.831-1.113) | 0.599          |
| Skin and soft tissue                        | 0.850 (0.558-1.296) | 0.451          | 0.544 (0.355-0.833) | 0.005          |
| Abdomen                                     | 1.423 (1.077-1.878) | 0.013          | 0.774 (0.583-1.027) | 0.076          |

Abbreviations: HR, hazard ratio; C.I., confidence interval; APACHE, acute physiology and chronic health evaluation.

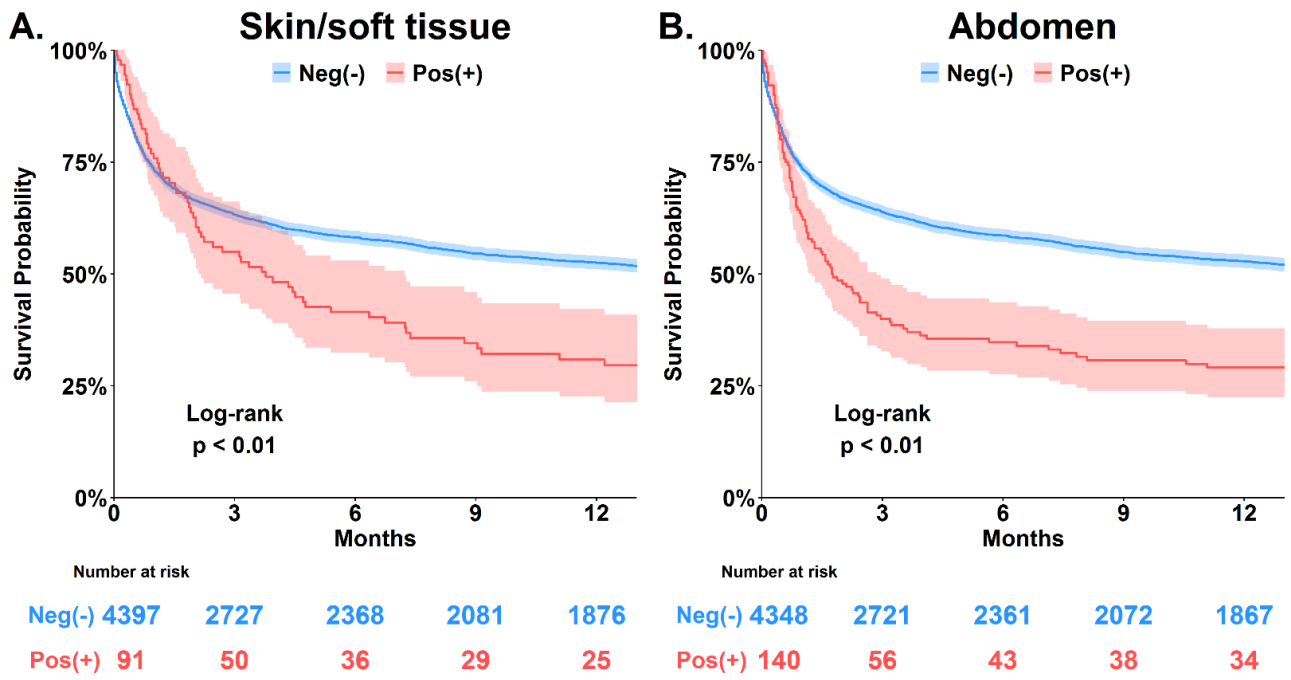

**Supplemental Figure 1. Kaplan-Meier survival curves for patients categorised by culture sites. (A) skin and soft tissue and (B) abdomen**
